# Supplementary material for: Intravenous Platelet Blockade with Cangrelor during PCI
Source: Atypon-hosted journal article supplement (doi:10.1056/nejmoa0908629), 2009-11-15

## Supplementary Appendix

This appendix has been provided by the authors to give readers additional information about their work.

Supplement to: Bhatt DL, Lincoff AM, Gibson CM, et al. Intravenous platelet blockade with cangrelor during PCI. N Engl J Med 2009;361:2330-41. DOI: 10.1056/NEJMoa0908629.

## Appendices

### CHAMPION Executive Committee

D.L. Bhatt (co-principal investigator), VA Boston Healthcare System and Brigham and Women's Hospital, Boston, MA; R.A. Harrington (co-principal investigator), Duke Clinical Research Institute, Duke University Medical Center, Durham, NC; A.M. Lincoff, Cleveland Clinic Foundation, Cleveland, OH; C.V. Pollack, Jr, Pennsylvania Hospital, University of Pennsylvania, Philadelphia, PA; C.M. Gibson, Beth Israel Deaconess Medical Center, Harvard Medical School, Boston, MA; G.W. Stone, Columbia University Medical Center and The Cardiovascular Research Foundation, New York, NY; K.W. Mahaffey, Duke Clinical Research Institute, Duke University Medical Center, Durham, NC; N.S. Kleiman, Methodist DeBakey Heart Center, The Methodist Hospital, Houston, TX; G. Montalescot, Institut de Cardiologie, Pitié-Salpêtrière Hospital, Paris, France; H.D. White, Green Lane Cardiovascular Service, Auckland City Hospital, Auckland, New Zealand; S.G. Goodman, Terrence Donnelly Heart Centre, Division of Cardiology, St. Michael's Hospital and the Canadian Heart Research Centre, Toronto, Ontario, Canada.

### CHAMPION Steering Committee

A. Greenbaum, Henry Ford Hospital, Detroit, MI; D. Simon, University Hospitals Case Medical Center, Cleveland, OH; D. Lee, Stanford Interventional Cardiology, Stanford, CA; F. Feit, New York University Hospital, NY, NY; H. Dauerman, The University of Vermont Fletcher Allen Medical Center, Burlington, VT; P. Gurbel, Sinai Hospital, Baltimore, MD; P. Berger, Geisinger Center for Clinical Studies, Danville, PA; R. Makkar, Cedar's-Sinai Heart Center, Los Angeles, CA; R.C. Becker, Duke Clinical Research Institute, Durham, NC; S. Manoukian, Centennial Heart Cardiovascular Center, Nashville, TN; J. Jorgova, UNSHAT (St. Ekatherina), Sofia, Bulgaria; D.P. Chew, Flinders University/Flinders Medical Centre, Adelaide, SA, Australia; R. Storey, Northern General Hospital, Sheffield, UK; W. Desmet, University Hospital Gasthuisberg, Leuven, Belgium; F. Cura, Instituto Cardiovascular de Buenos Aires, Buenos Aires, Argentina; H. Herrmann, University of Pennsylvania Hospital Center, Philadelphia, PA; D. Rizik, Scottsdale Healthcare, Scottsdale, AZ; S. DeServi, Azienda Ospedaliera di Legnano, Legnano, Italy; K. Huber, Wilhelminenhospital, Vienna, Austria; W.J. Jukema, Leiden University Medical Center, Leiden, The Netherlands; W. Knopf, St. Joseph's Hospital, Atlanta, GA; P.G. Steg, Hôpital Bichat-Claude Bernard, Paris, France; H. Schunkert, Universitaetsklinikum Schleswig-Holstein Campus Luebeck, Luebeck, Germany; P. Widimsky, Charles University, Prague, Czech Republic; A. Betriu, University of Barcelona, Barcelona, Spain

### CHAMPION National Coordinators

**Australia:** P. Aylward, Flinders University/Flinders Medical Centre, Adelaide, SA, Australia; **Belarus:** L. Polonestsky, Republican Research and Practical Centre Cardiology of The Ministry of Health of Republic of Belarus; **Brazil:** V. Lima, Universidade Federal do Estado de São Paulo, Hospital São Paulo; **Bulgaria:** J. Jorgova, UNSHAT, St. Ekatherina; **Czech Republic:** P. Widimsky, Charles University; **Georgia:** B. Kobulia, Clinic of Angiocardiology, ADAPTI; **Lithuania:** R. Navickas, Kaunas Medical University Hospital, Cardiology Department; **Poland:** Z. Gasior, Śląskiego Uniwersytetu Medycznego Katowicach, Gornoslaskie Centrum Medyczne, II Oddzial Kardiologii; **Russia:** E. Vasilieva, Cardiology, City Hospital #23; **South Africa:** J.M.

Bennett, Life Wilgers Hospital; **Ukraine:** I. Kraiz, State Treatment and Prevention Institution, Central Clinical Hospital of Ukrainian Railway, Department of Cardiology.

### **CHAMPION Data Safety and Monitoring Board**

F. Van de Werf (chair), Leuven Clinical Coordinating Center; D. Faxon, Brigham and Women's Hospital; E.M. Ohman, Duke Clinical Research Institute; J.G.P. Tijssen, Academic Medical Center, University of Amsterdam; F. Verheugt, University Medical Center; W.D. Weaver, Henry Ford Hospital

### **CHAMPION Interim Analysis Review Committee**

R.M. Califf (chair), Duke Translational Medicine Institute, Durham, NC; C. Mehta, Cytel Software Corporation, Cambridge, MA; C.W. Hamm, Kerckhoff Heart Center, Bad Nauheim, Germany; C.J. Pepine, University of Florida, Gainesville, FL; J. Ware, Harvard School of Public Health, Cambridge, MA

### **CHAMPION Clinical Events Committee**

K.W. Mahaffey (chair); M. Wilson (lead CEC CTC); C. Gorham (lead CEC CDA); A. Maran; S. McNulty; D. Fasteson; G. Ryan; J. Bradsher; P. Connolly; R. Mehta; S. Leonardi; M. Brennan; M. Patel; J. Petersen; C. Bushnell; M. Jolicoeur; M. Chan; L. Dowd; P. Skinner; G. Lawrence; M. Jordon; S. Dickerson; M. Meyer; S. Hartford, Duke Clinical Research Institute, Durham, NC

### **CHAMPION PLATFORM Investigators:**

#### **Participating Countries (with total enrollment), principal investigators and hospitals:**

**Argentina (total enrollment=82):** Fernando Cura, Instituto Cardiovascular de Buenos Aires; Alejandro Garcia Escudero, Sanatorio Junin; Carlos Poy, Sanatorio Parque; Miguel Miceli, Hospital Ramon Carrillo; Antonio Pocovi, Sanatorio de la Trinidad Mitre; Hugo Londero, Sanatorio Allende; Jorge Baccaro, Instituto Cardiovascular de Corrientes; **Belarus (total enrollment=64):** Leonid Polonetsky, Republican Research and Practical Centre Cardiology of The Ministry of Health of Rep of Belarus; Aliaksey Karotkin, 1st Minsk City Clinical Hospital; Leanid Shubau, Gomel Regional Clinical Cardiology Dispensary; **Brazil (total enrollment=98):** Eduardo Maffini, Universidade de Caxias do Sul, Caxias do Sul-RS; Bruno Machado, Centro Integrado de Atenção à Saúde, Vitória-ES; José Airton, Hospital Meridional, Cariacica-ES; Valter Lima, Universidade Federal do Estado de São Paulo-Hospital São Paulo, São Paulo-SP; Eulogio Martinez Filho, Faculdade de Medicina da USP-INCOR, São Paulo-SP; Arthur Herdy, Instituto de Cardiologia-Hospital Regional de São José, Florianópolis-SC; Rogerio Tumelero, Hospital São Vicente de Paulo, Passo Fundo-RS; Dalton Precoma, Sociedade Hospitalar Angelina Caron, Campina Grande do Sul-PR; Roberto Botelho, Instituto do Coração do Triângulo Mineiro, Uberlândia-MG; Jamil Saad, Hospital Felício Rocho, Belo Horizonte-MG; Jose Jatene, Hospital Lúcio Rebelo, Goiânia-GO; Fabio Vilas-Boas, Hospital Espanhol, Salvador-BA; Antonio Godinho, Fundação Bahiana de Cardiologia, Salvador-BA; Marco Perin, Casa de Saúde Santa Marcelina, São Paulo-SP; Paulo Caramori, Hospital São Lucas da PUCRS, Porto Alegre-RS; Iran Castro, Instituto de Cardiologia do Rio Grande do Sul, Porto Alegre-RS; **Bulgaria (total enrollment=803):** Ivan Manukov, Clinic of Invasive Cardiology, UMHAT Sveti Georgi EAD-Plovdiv; Mladen Grigorov, SHAT of Cardiology; Plamen Milkov, Cardiology Clinic, 2nd MHAT-Sofia; Julia Jorgova, Cardiology Clinic, UNSHAT St. Ekatherina; Svetoslav Georgiev, 2nd Clinic of Cardiology, MHAT Sveta Marina; Nizar Rifai, Clinic of Cardiology,

UMHAT Sv. Anna; Alexander Doganov, Clinic of Cardiology, National Cardiology Hospital; Ivo Petrov, Department of Cardiology, Tokuda Hospital; **Canada (total enrollment=5):** William Hui, Royal Alexandra Hospital; Charles Lazzam, Trillium Health Centre; Francois Reeves, Hôpital Notre-Dame du CHUM; Jean-Francois Tanguay, Montreal Heart Hospital; **Czech Republic (total enrollment=687):** Marek Richter, Faculty Hospital Olomouc, 1st Internal Clinic; Frantisek Tousek, Hospital Ceske Budejovice, Cardiocenter-Cardiology; Zdenek Klimsa, Hospital Jihlava and Cardiocenter Vysocina CZ; Michal Padour, Regional Hospital Karlovy Vary, Department of Interventional Cardiology; Jan Mrozek, 2nd Internal-Cardiovascular Department of Municipal Hospital Ostrava; Marian Branny, Hospital Podlesi, Cardiocenter; Zdenek Coufal, Bata Regional Hospital Inc., Internal Clinic; Stanislav Simek, General Faculty Hospital, 2nd Internal Clinic; Vladimir Rozsival, Hospital Pardubice, Internal Clinic, Cardiology; Leos Pleva, Faculty Hospital Ostrava, Internal Clinic, Department of Invasive Cardiology; Josef Stasek, Faculty Hospital Hradec Kralove, Internal Clinic-Department of Invasive Cardiology; Petr Kala, Faculty Hospital Brno, Internal and Cardiological Department; Ladislav Groch, Faculty Hospital, Anny Brno, 1st Internal-Cardioangiological Department; Viktor Kocka, Faculty Hospital Kralovske Vinohrady 3rd Internal Cardiology Clinic; **Georgia (total enrollment=90):** Tamaz Shaburishvili, Diagnostic Services Clinic; Irakli Khintibidze, Tbilisi State Medical University Alexandre Aladashvili University Clinic; Gulnara Chapidze, Emergency Cardiology Centre; Merab Mamatsashvili, Clinic of Angiocardiology ADAPTI; **India (total enrollment=473):** Padinhare Mohanan, West Fort Hi-Tech Hospital Ltd; Rajesh Jain, CHL-Apollo Hospitals; Keyur Parikh, S.A.L. Hospital; Tejas Patel, Krishna Heart and Super Speciality Institute; Sampath Kumar, Osmania Hospital; Ashwani Mehta, Dharma Vira Heart Centre; Darshan Banker, Bankers Heart Institute; Lanka Krishna, Nizam's Institute of Medical Sciences; Milind Gadkari, KEM Hospital and Research Center; Hasit Joshi, Apollo Hospitals International Ltd; Jaspal Arneja, Arneja Heart Institute; Shirish Hiremath, Grant Medical Foundation; **Lithuania (total enrollment=111):** Virgilijus Grinius, Kaunas Medical University Hospital, Cardiology Department; Sigute Norkiene, Klaipeda Seamen's Hospital, 3rd Cardiology Department; Birute Petrauskiene, Vilnius University Hospital Santariskiu Klinikos, Centre of Cardiology and Angiology; **Netherlands (total enrollment=61):** Rolf Michels, Catharina Hospital Department R&D, Cardiology; Melvin Tjon, Rijnstate Hospital Arnhem; Hans de Swart, Medisch Centrum Alkmaar; Robbert de Winter, Academic Medical Center Amsterdam; **New Zealand (total enrollment=42):** Harvey White, Auckland City Hospital; Gerard Devlin, Waikato Hospital; Malcolm Abernethy, Wakefield; **Russia (total enrollment=433):** Alexander Osiev, FSI Novosibirsk Research Institute of Circulation Pathology; Kirill Linev, Territorial State Healthcare Institution, Territorial Clinical Hospital; Svetlana Kalinina, Cardiology, Clinical Centre Cardiology; Svetlana Baum, Railway Clinical Hospital of RZhD on the Station Novosibirsk-Glavny; Elena Kosmachova, Territorial Clinical Hospital #1; Zaur Shogenov, City Clinical Hospital #81; Valentin Markov, Coronary Care Unite, Cardiology Research Institute; Svetlana Boldueva, Department of Cardiology, St. Petersburg State Medical Academy n.a. I.I. Mechnikov; Olga Barbarash, Cardiology and Cardiosurgery, Kemerovo Cardiology Dispensary; Victor Kostenko, AMI, Research Institute of Emergency Medical Care; Elena Vasilieva, Cardiology, City Hospital #23; Aleksey Gruzdev, Cardiology, Central Clinical Hospital; Victor Lusov, Cardiology, City Hospital #15; Pavel Dovgalevsky, Cardiology, Saratov Institute of Cardiology; Oleg Azarin, Cardiology, Voronezh Regional Hospital; Sergey Chernov, FSI Main Military Hospital na Burdenko; Olga Smolenskaya, Cardiology, Ural SMA b.o. City Clinical Hospital #41; Alexey Duda, Altay Regional Cardiology

Dispensary; **Slovakia (total enrollment=62):** Viliam Fridrich, Národný, Oddelenie Intervenčnej Kardiológie; Marian Hranai, Kardiocentrum Nitra; Martin Studenčan, Východoslovenský, Kardiologické Oddelenie; Peter Kurray, Stredoslovenský, Oddelenie Koronárnej Jednotky; **South Africa (total enrollment=207):** John Bennett, Life Wilgers Hospital; Pieter Blomerus, Unitas Hospital; Laurence Disler, Linksfield Park Clinic; Johannes Engelbrecht, Vergelegen Medi Clinic; Eric Klug, Sunninghill Hospital; Robert Routier, Olivedale Clinic; Tjaart Venter, Union Hospital; Eric Klug, Sunward Park Hospital; Nico Van Der Merwe, Bloemfontein Medi-Clinic; Anthony Becker, Morningside Clinic; **South Korea (total enrollment=332):** Kwang-Soo Cha, Dong-A University Hospital; Seung-Hwan Lee, Wonju Christian Hospital, Yonsei University Wonju College of Medicine; Sang-Jin Han, Chuncheon Sacred Heart Hospital, Hallym University Medical Center; Tae Jin Youn, Seoul National University Bundang Hospital; Seung-Ho Hur, Keimyung University Dongsan Medical Center; Hong Seog Seo, Korea University Guro Hospital; Hun-Sik Park, Kyungpook National University Hospital; Chong-Yun Rhim, Hallym University Sacred Heart Hospital; Wook-Bum Pyun, Ewha Womans University Dongdaemun Hospital; Hyunmin Choe, Inje University Ilsan Paik Hospital; Myung-Ho Jeong, Chunnam National University Hospital; Jong-Seon Park, Yeungnam University Hospital; Eak-Kyun Shin, Gachon Medical School, Gil Medical Center; **Spain (total enrollment=39):** Felipe Hernández, Hospital 12 de Octubre; Jaume Figueras, Hospital Vall D'Hebrón; Rosana Hernández, Hospital Clinico San Carlos; José Ramón López-Minguez, Hospital Infanta Cristina; José Ramón González Juanatey, Hospital Clinico Universitario Santiago; Ramón López Palop, Hospital San Juan de Alicante; Guillermo Galeote, Hospital La Paz; **Thailand (total enrollment=117):** Noppadol Chamnarnphol, Songklanagarind Hospital; Wacin Buddhari, King Chulalongkorn Memorial Hospital; Nakarin Sansanayudh, Phramongkutklao Hospital; Srun Kuanprasert, Maharaj Nakorn Chiang Mai Hospital; **United States (total enrollment=1658):** William Penny, San Diego VA Medical Center, CA; Charles Lui, UT-Galveston, TX; Garfield Grimmett, Dakota Clinic, Innovis Health, ND; Venkatraman Srinivasan, Western PA Hospital, PA; Kevin Ariani, Northridge Hospital, CA; Waqor Khan, Tomball Regional Hospital, TX; James Blankenship, Geisinger Medical Center, PA; Louis Cannon, Northern Michigan Hospital, MI; Steven Eisenberg, St. Joseph's Hospital of Atlanta, GA; M. Zubair Jafar, Hudson Valley Heart Center/Vassar Brothers Medical Center, NY; Brent McLaurin, Anderson Area Medical Center, SC; Paul Mahoney, Sentara Norfolk General Hospital, VA; Jerry Greenberg, Medical Center of Aurora, CO; Jeffrey Breall, Clarian Health Partners, IN; Harish Chandna, Detar Hospital, TX; Eric Hockstad, Kansas City Heart Foundation, MO; Paul Tolerico, York Hospital, PA; John Kao, Jesse Brown VAMC, IL; Adhir Shroff, University of Illinois at Chicago Medical Center, IL; Georges Nseir, Chandler Regional Hospital, AZ; Adam Greenbaum, Henry Ford Hospital, MI; Joel Cohn, Ingham Regional Medical Center, MI; Harinder Gogia, Anaheim Memorial Medical Center, CA; Ahed Nahhas, Toledo Hospital, OH; Pierre Istfan, Wellmont Bristol Regional Medical Center, TN; Steve Orlow, Lutheran Hospital of Indiana, IN; Douglas Spriggs, Clearwater Cardiovascular & Interventional Consultant, FL; Joel Sklar, Marin General Hospital, CA; Richard Paulus, King's Daughters Medical Center, KY; David Cochran, St. John's Hospital, MO; Robert Smith, Trinity Mother Francis Hospital, East Texas Med Center, TX; L. Norman Ferrier, Rapid City Regional Hospital, SD; J. Christopher Scott, University of Tennessee Medical Center, TN; Nicholaos Xenopoulos, Jewish Hospital, KY; Mahesh Mulumudi, Providence Everett Medical Center, WA; James Hoback, Chattanooga Heart Institute, TN; Wilson Ginete, St. Mary's Medical Center, Duluth Clinic, MN; William Ballard, Piedmont Hospital/Fuqua Heart Center of Atlanta, GA; Joseph Stella, St. Francis Hospital, IL; Michele

Voeltz, Emory University Hospital Midtown, GA; Cezar Staniloae, St. Vincent Catholic Medical Center, NY; Gregory Eaton, MedCentral Health System, OH; John Griffin, Cardiovascular Associates, Sentara Virginia Beach General, VA; Krishna Kumar, The Wisconsin Heart Hospital, WI; Ramin Ebrahimi, VAMC-GLAHS, CA; Charles O'Shaughnessy, DMH Regional Medical Center, OH; Robert Lundstrom, Kaiser Permanente Medical Center, CA; Dogan Temizer, Good Samaritan Hospital, OH; Kenneth Tam, Providence Holy Cross Medical Center, CA; Jose Suarez, University Cardiology Group, TX; Amish Raval, University of Wisconsin School of Medicine and Public Health, WI; Jay Kaufman, Maricopa Integrated Health Systems, AZ; Emmanouil Brilakis, Dallas VA Medical Center, TX; Michael Stillabower, Christiana Care Health Services, DE; Kathleen Quealy, Metro Health Medical Center, OH; Boris Nunez, Winter Haven Hospital, FL; Thomas Pow, Lakeland Hospital St. Joseph, MI; Bruce Samuels, Cedars-Sinai Medical Center/CVIC, CA; Agustin Argenal, John Muir Hospital, CA; Vankeepuram Srinivas, Jack D. Weiler Hospital, NY; Andrew Rosenthal, The Heart and Vascular Institute of Florida, FL; Pradyumna Tummala, Northeast Georgia Medical Center, GA; Paul Myers, Centennial Medical Center, TN; Georges Nseir, Mercy Gilbert Medical Center, AZ; Nelson LaMarche, Jersey Shore Medical Center, NJ; Michael Chan, St. Joseph Hospital, CA; Harinder Gogia, Western Medical Center Santa Ana, CA; Richard Bach, Washington University/Barnes-Jewish Hospital, MO; Daniel Simon, University Hospital of Cleveland, OH; Richard Kettelkamp, Mercy Hospital, IA; Tarek Helmy, University Hospital, OH; Gary Schaer, Rush University Medical Center, IL; Edward Kosinski, Connecticut Clinical Research, LLC, CT; Maurice Buchbinder, Foundation for Cardiovascular Medicine, CA; Mukesh Sharma, Parkway Cardiology Associates, PC/Methodist Medical Center, TN; Mark Goodwin, Edward Hospital, IL; Phillip Horwitz, University of Iowa Hospital, IA; J. Tift Mann, III, Wake Heart Research, NC; David Holmes, Jr., Mayo Clinic-Rochester, MN; Dominick Angiolillo, University of Florida Health Science Center, FL; Sunil Rao, Duke University Medical Center, NC; Michael Azrin, University of CT Health Center, CT; Roger Gammon, The Heart Hospital of Austin, TX; Kreton Mavromatis, Atlanta VA Medical Center, GA; Abdel Ahmed, Altru Health System, ND; Kenneth Kent, Suburban Hospital, MD; Marcel Zughuib, Providence Hospital, MI; R. Jeffrey Westcott, Swedish Heart & Vascular Institute, WA; Ash Jain, Washington Hospital, CA; Luis Gruberg, Stony Brook University Hospital, NY; Thomas LeGalley, Upper Michigan Cardiovascular Associates (Marquette General Health System), MI.

**Online Table 1.** 30-day endpoints for ITT, MITT, and Safety Populations

|                                  | <b><u>ITT</u></b>  |                    |                    |                |
|----------------------------------|--------------------|--------------------|--------------------|----------------|
|                                  | <b>Cangrelor</b>   | <b>Clopidogrel</b> | <b>OR (95% CI)</b> | <b>P Value</b> |
|                                  | <b>(N=2693)</b>    | <b>(N=2669)</b>    |                    |                |
| <b>Adjudicated endpoints</b>     |                    |                    |                    |                |
| Death/MI/IDR                     | 230 (8.6)          | 254 (9.6)          | 0.89 (0.73, 1.07)  | 0.20           |
| MI                               | 190 (7.1)          | 202 (7.6)          | 0.92 (0.75, 1.14)  | 0.45           |
| IDR                              | 37 (1.4)           | 49 (1.8)           | 0.74 (0.48, 1.14)  | 0.18           |
| All-cause mortality              | 36 (1.3)           | 47 (1.8)           | 0.75 (0.49, 1.17)  | 0.20           |
| Stent thrombosis                 | 15 (0.6)           | 29 (1.1)           | 0.51 (0.27, 0.95)  | 0.03           |
| Q-wave MI                        | 8 (0.3)            | 15 (0.6)           | 0.53 (0.22, 1.24)  | 0.14           |
| <b>Exploratory endpoints</b>     |                    |                    |                    |                |
| Death/Q-wave MI/IDR              | 69 (2.6)           | 94 (3.5)           | 0.72 (0.52, 0.98)  | 0.04           |
| Death/Q-wave MI/Stent thrombosis | 51 (1.9)           | 77 (2.9)           | 0.65 (0.45, 0.93)  | 0.02           |
|                                  | <b><u>MITT</u></b> |                    |                    |                |
|                                  | <b>Cangrelor</b>   | <b>Clopidogrel</b> | <b>OR (95% CI)</b> | <b>P Value</b> |
|                                  | <b>(N=2656)</b>    | <b>(N=2645)</b>    |                    |                |
| <b>Adjudicated endpoints</b>     |                    |                    |                    |                |
| Death/MI/IDR                     | 226 (8.5)          | 249 (9.5)          | 0.89 (0.74, 1.08)  | 0.24           |
| MI                               | 189 (7.1)          | 201 (7.6)          | 0.93 (0.76, 1.14)  | 0.48           |
| IDR                              | 37 (1.4)           | 46 (1.7)           | 0.80 (0.52, 1.23)  | 0.31           |
| All-cause mortality              | 33 (1.2)           | 45 (1.7)           | 0.73 (0.46, 1.14)  | 0.16           |
| Stent thrombosis                 | 15 (0.6)           | 28 (1.1)           | 0.53 (0.28, 0.99)  | 0.05           |

|                                  |          |          |                   |      |
|----------------------------------|----------|----------|-------------------|------|
| Q-wave MI                        | 8 (0.3)  | 14 (0.5) | 0.57 (0.24, 1.35) | 0.20 |
| <b>Exploratory endpoints</b>     |          |          |                   |      |
| Death/Q-wave MI/IDR              | 66 (2.5) | 89 (3.4) | 0.73 (0.53, 1.01) | 0.06 |
| Death/Q-wave MI/Stent thrombosis | 48 (1.8) | 73 (2.8) | 0.65 (0.45, 0.94) | 0.02 |

---

**Safety**

|                                  | <b>Cangrelor</b> | <b>Clopidogrel</b> | <b>OR (95% CI)</b> | <b>P Value</b> |
|----------------------------------|------------------|--------------------|--------------------|----------------|
|                                  | <b>(N=2662)</b>  | <b>(N=2650)</b>    |                    |                |
| <b>Adjudicated endpoints</b>     |                  |                    |                    |                |
| Death/MI/IDR                     | 226 (8.5)        | 251 (9.5)          | 0.88 (0.73, 1.07)  | 0.20           |
| MI                               | 188 (7.1)        | 203 (7.7)          | 0.91 (0.74, 1.12)  | 0.39           |
| IDR                              | 37 (1.4)         | 47 (1.8)           | 0.78 (0.50, 1.20)  | 0.26           |
| All-cause mortality              | 34 (1.3)         | 45 (1.7)           | 0.75 (0.48, 1.17)  | 0.20           |
| Stent thrombosis                 | 15 (0.6)         | 28 (1.1)           | 0.53 (0.28, 0.99)  | 0.05           |
| Q-wave MI                        | 8 (0.3)          | 15 (0.6)           | 0.53 (0.22, 1.25)  | 0.15           |
| <b>Exploratory endpoints</b>     |                  |                    |                    |                |
| Death/Q-wave MI/IDR              | 67 (2.5)         | 90 (3.4)           | 0.73 (0.53, 1.01)  | 0.06           |
| Death/Q-wave MI/Stent thrombosis | 49 (1.8)         | 74 (2.8)           | 0.65 (0.45, 0.94)  | 0.02           |

---

Variables are presented as no. (%) unless otherwise indicated. CI denotes confidence interval; IDR, ischemia-driven revascularization; ITT, intent to treat; MI, myocardial infarction; MITT, modified intent to treat; OR, odds ratio.

**Online Table 2.** 48-hour adverse events by body system and preferred term for the Safety

Population

|                                             | <b>Cangrelor</b> | <b>Clopidogrel</b> |
|---------------------------------------------|------------------|--------------------|
|                                             | <b>(N=2662)</b>  | <b>(N=2650)</b>    |
| <b>Blood and lymphatic system disorders</b> |                  |                    |
| Anaemia                                     | 4 (0.1)          | 2 (0.1)            |
| Eosinophilia                                | 1 (0.0)          | 0 (0.0)            |
| Haemorrhagic anaemia                        | 1 (0.0)          | 0 (0.0)            |
| Leukocytosis                                | 3 (0.1)          | 2 (0.1)            |
| Microcytic anaemia                          | 1 (0.0)          | 0 (0.0)            |
| Thrombocytopenia                            | 2 (0.1)          | 0 (0.0)            |
| <b>Cardiac disorders</b>                    |                  |                    |
| Acute left ventricular failure              | 0 (0.0)          | 1 (0.0)            |
| Angina pectoris                             | 11 (0.4)         | 17 (0.6)           |
| Angina unstable                             | 2 (0.1)          | 2 (0.1)            |
| Arrhythmia                                  | 0 (0.0)          | 1 (0.0)            |
| Atrial fibrillation                         | 7 (0.3)          | 8 (0.3)            |
| Atrial flutter                              | 2 (0.1)          | 2 (0.1)            |
| Atrioventricular block                      | 1 (0.0)          | 2 (0.1)            |
| Atrioventricular block first degree         | 1 (0.0)          | 0 (0.0)            |
| Atrioventricular block second degree        | 0 (0.0)          | 1 (0.0)            |
| Atrioventricular block third degree         | 5 (0.2)          | 0 (0.0)            |
| Bradycardia                                 | 10 (0.4)         | 14 (0.5)           |

|                                | <b>Cangrelor</b> | <b>Clopidogrel</b> |
|--------------------------------|------------------|--------------------|
|                                | <b>(N=2662)</b>  | <b>(N=2650)</b>    |
| Cardiac arrest                 | 1 (0.0)          | 3 (0.1)            |
| Cardiac failure                | 3 (0.1)          | 1 (0.0)            |
| Cardiac failure acute          | 2 (0.1)          | 0 (0.0)            |
| Cardiac failure congestive     | 4 (0.1)          | 4 (0.1)            |
| Cardiac flutter                | 0 (0.0)          | 1 (0.0)            |
| Cardiac tamponade              | 0 (0.0)          | 1 (0.0)            |
| Cardiogenic shock              | 6 (0.2)          | 11 (0.4)           |
| Cardiomegaly                   | 0 (0.0)          | 1 (0.0)            |
| Coronary artery dissection     | 10 (0.4)         | 7 (0.3)            |
| Coronary artery embolism       | 0 (0.0)          | 1 (0.0)            |
| Coronary artery occlusion      | 3 (0.1)          | 5 (0.2)            |
| Coronary artery perforation    | 2 (0.1)          | 0 (0.0)            |
| Coronary artery thrombosis     | 1 (0.0)          | 1 (0.0)            |
| Electromechanical dissociation | 1 (0.0)          | 3 (0.1)            |
| Extrasystoles                  | 0 (0.0)          | 1 (0.0)            |
| Ischaemic cardiomyopathy       | 0 (0.0)          | 1 (0.0)            |
| Left ventricular failure       | 3 (0.1)          | 3 (0.1)            |
| Mitral valve incompetence      | 1 (0.0)          | 0 (0.0)            |
| Myocardial infarction          | 1 (0.0)          | 1 (0.0)            |
| Myocardial rupture             | 0 (0.0)          | 1 (0.0)            |
| Nodal arrhythmia               | 3 (0.1)          | 0 (0.0)            |

|                                            | <b>Cangrelor</b> | <b>Clopidogrel</b> |
|--------------------------------------------|------------------|--------------------|
|                                            | <b>(N=2662)</b>  | <b>(N=2650)</b>    |
| Nodal rhythm                               | 1 (0.0)          | 0 (0.0)            |
| Palpitations                               | 2 (0.1)          | 5 (0.2)            |
| Pericarditis                               | 0 (0.0)          | 1 (0.0)            |
| Sick sinus syndrome                        | 1 (0.0)          | 0 (0.0)            |
| Sinus arrest                               | 1 (0.0)          | 0 (0.0)            |
| Sinus bradycardia                          | 1 (0.0)          | 2 (0.1)            |
| Sinus tachycardia                          | 1 (0.0)          | 2 (0.1)            |
| Supraventricular extrasystoles             | 1 (0.0)          | 0 (0.0)            |
| Supraventricular tachycardia               | 3 (0.1)          | 1 (0.0)            |
| Tachyarrhythmia                            | 1 (0.0)          | 0 (0.0)            |
| Tachycardia                                | 3 (0.1)          | 3 (0.1)            |
| Torsade de pointes                         | 0 (0.0)          | 2 (0.1)            |
| Ventricular arrhythmia                     | 1 (0.0)          | 0 (0.0)            |
| Ventricular dysfunction                    | 0 (0.0)          | 1 (0.0)            |
| Ventricular extrasystoles                  | 4 (0.1)          | 4 (0.1)            |
| Ventricular fibrillation                   | 6 (0.2)          | 7 (0.3)            |
| Ventricular tachycardia                    | 10 (0.4)         | 11 (0.4)           |
| Congenital, familial and genetic disorders |                  |                    |
| Myocardial bridging                        | 0 (0.0)          | 1 (0.0)            |
| Ear and labyrinth disorders                |                  |                    |
| Ear haemorrhage                            | 1 (0.0)          | 0 (0.0)            |

|                            | <b>Cangrelor</b> | <b>Clopidogrel</b> |
|----------------------------|------------------|--------------------|
|                            | <b>(N=2662)</b>  | <b>(N=2650)</b>    |
| Tinnitus                   | 0 (0.0)          | 1 (0.0)            |
| Vertigo                    | 3 (0.1)          | 2 (0.1)            |
| Eye disorders              |                  |                    |
| Diplopia                   | 0 (0.0)          | 1 (0.0)            |
| Vision blurred             | 0 (0.0)          | 1 (0.0)            |
| Visual disturbance         | 1 (0.0)          | 0 (0.0)            |
| Gastrointestinal disorders |                  |                    |
| Abdominal discomfort       | 2 (0.1)          | 3 (0.1)            |
| Abdominal pain             | 9 (0.3)          | 8 (0.3)            |
| Abdominal pain lower       | 2 (0.1)          | 1 (0.0)            |
| Abdominal pain upper       | 4 (0.1)          | 2 (0.1)            |
| Abdominal tenderness       | 1 (0.0)          | 0 (0.0)            |
| Barrett's oesophagus       | 0 (0.0)          | 1 (0.0)            |
| Constipation               | 6 (0.2)          | 4 (0.1)            |
| Diarrhoea                  | 6 (0.2)          | 3 (0.1)            |
| Duodenitis                 | 1 (0.0)          | 0 (0.0)            |
| Duodenogastric reflux      | 1 (0.0)          | 0 (0.0)            |
| Dyspepsia                  | 10 (0.4)         | 8 (0.3)            |
| Enteritis                  | 1 (0.0)          | 0 (0.0)            |
| Epigastric discomfort      | 1 (0.0)          | 0 (0.0)            |
| Erosive oesophagitis       | 1 (0.0)          | 0 (0.0)            |

|                                                      | <b>Cangrelor</b> | <b>Clopidogrel</b> |
|------------------------------------------------------|------------------|--------------------|
|                                                      | <b>(N=2662)</b>  | <b>(N=2650)</b>    |
| Gastritis                                            | 1 (0.0)          | 0 (0.0)            |
| Nausea                                               | 71 (2.6)         | 65 (2.4)           |
| Retroperitoneal haemorrhage                          | 1 (0.0)          | 0 (0.0)            |
| Stomach discomfort                                   | 1 (0.0)          | 0 (0.0)            |
| Vomiting                                             | 37 (1.4)         | 31 (1.2)           |
| General disorders and administration site conditions |                  |                    |
| Asthenia                                             | 4 (0.1)          | 3 (0.1)            |
| Catheter site pain                                   | 3 (0.1)          | 5 (0.2)            |
| Chest discomfort                                     | 12 (0.4)         | 11 (0.4)           |
| Chest pain                                           | 73 (2.7)         | 67 (2.5)           |
| Chills                                               | 1 (0.0)          | 3 (0.1)            |
| Discomfort                                           | 1 (0.0)          | 3 (0.1)            |
| Fatigue                                              | 4 (0.1)          | 1 (0.0)            |
| Feeling abnormal                                     | 0 (0.0)          | 1 (0.0)            |
| Hyperthermia                                         | 0 (0.0)          | 1 (0.0)            |
| Infusion site bruising                               | 0 (0.0)          | 1 (0.0)            |
| Infusion site extravasation                          | 1 (0.0)          | 3 (0.1)            |
| Infusion site inflammation                           | 0 (0.0)          | 1 (0.0)            |
| Infusion site pain                                   | 0 (0.0)          | 1 (0.0)            |
| Infusion site phlebitis                              | 0 (0.0)          | 1 (0.0)            |

|                                | <b>Cangrelor</b> | <b>Clopidogrel</b> |
|--------------------------------|------------------|--------------------|
|                                | <b>(N=2662)</b>  | <b>(N=2650)</b>    |
| Injection site phlebitis       | 0 (0.0)          | 1 (0.0)            |
| Malaise                        | 2 (0.1)          | 0 (0.0)            |
| Multi-organ failure            | 0 (0.0)          | 1 (0.0)            |
| Non-cardiac chest pain         | 7 (0.3)          | 8 (0.3)            |
| Oedema peripheral              | 1 (0.0)          | 1 (0.0)            |
| Pain                           | 14 (0.5)         | 7 (0.3)            |
| Paradoxical drug reaction      | 0 (0.0)          | 1 (0.0)            |
| Puncture site pain             | 21 (0.8)         | 28 (1.0)           |
| Pyrexia                        | 36 (1.3)         | 20 (0.7)           |
| Vessel puncture site haematoma | 1 (0.0)          | 0 (0.0)            |
| Hepatobiliary disorders        |                  |                    |
| Hepatomegaly                   | 0 (0.0)          | 1 (0.0)            |
| Hyperbilirubinaemia            | 1 (0.0)          | 2 (0.1)            |
| Immune system disorders        |                  |                    |
| Hypersensitivity               | 2 (0.1)          | 0 (0.0)            |
| Infections and infestations    |                  |                    |
| Bacterial sepsis               | 0 (0.0)          | 1 (0.0)            |
| Bronchitis acute               | 1 (0.0)          | 0 (0.0)            |
| Bronchopneumonia               | 1 (0.0)          | 0 (0.0)            |
| Catheter sepsis                | 1 (0.0)          | 0 (0.0)            |
| Endocarditis                   | 0 (0.0)          | 1 (0.0)            |

|                                                       | <b>Cangrelor</b> | <b>Clopidogrel</b> |
|-------------------------------------------------------|------------------|--------------------|
|                                                       | <b>(N=2662)</b>  | <b>(N=2650)</b>    |
| Gastroenteritis                                       | 0 (0.0)          | 1 (0.0)            |
| Lung infection                                        | 0 (0.0)          | 1 (0.0)            |
| Pneumonia                                             | 4 (0.1)          | 2 (0.1)            |
| Pyelonephritis chronic                                | 0 (0.0)          | 1 (0.0)            |
| Respiratory tract infection                           | 0 (0.0)          | 2 (0.1)            |
| Urinary tract infection                               | 6 (0.2)          | 0 (0.0)            |
| <b>Injury, poisoning and procedural complications</b> |                  |                    |
| Arterial injury                                       | 0 (0.0)          | 1 (0.0)            |
| Brain contusion                                       | 1 (0.0)          | 0 (0.0)            |
| Device breakage                                       | 1 (0.0)          | 0 (0.0)            |
| Excoriation                                           | 0 (0.0)          | 2 (0.1)            |
| Fall                                                  | 1 (0.0)          | 0 (0.0)            |
| Head injury                                           | 1 (0.0)          | 0 (0.0)            |
| Incorrect dose administered                           | 1 (0.0)          | 0 (0.0)            |
| Post procedural discomfort                            | 0 (0.0)          | 1 (0.0)            |
| Post procedural haematuria                            | 0 (0.0)          | 1 (0.0)            |
| Post procedural headache                              | 1 (0.0)          | 0 (0.0)            |
| Post procedural nausea                                | 1 (0.0)          | 0 (0.0)            |
| Post procedural swelling                              | 1 (0.0)          | 1 (0.0)            |
| Post procedural vomiting                              | 1 (0.0)          | 0 (0.0)            |
| Procedural hypertension                               | 1 (0.0)          | 3 (0.1)            |

|                                              | <b>Cangrelor</b> | <b>Clopidogrel</b> |
|----------------------------------------------|------------------|--------------------|
|                                              | <b>(N=2662)</b>  | <b>(N=2650)</b>    |
| Procedural hypotension                       | 0 (0.0)          | 2 (0.1)            |
| Procedural pain                              | 6 (0.2)          | 0 (0.0)            |
| Skin laceration                              | 1 (0.0)          | 0 (0.0)            |
| Thrombosis in device                         | 1 (0.0)          | 2 (0.1)            |
| Urinary retention postoperative              | 0 (0.0)          | 1 (0.0)            |
| Vascular procedure complication              | 2 (0.1)          | 3 (0.1)            |
| <b>Investigations</b>                        |                  |                    |
| Alanine aminotransferase increased           | 0 (0.0)          | 1 (0.0)            |
| Anticoagulation drug level below therapeutic | 1 (0.0)          | 0 (0.0)            |
| Aspartate aminotransferase increased         | 3 (0.1)          | 2 (0.1)            |
| Blood bilirubin increased                    | 1 (0.0)          | 2 (0.1)            |
| Blood creatine phosphokinase increased       | 0 (0.0)          | 1 (0.0)            |
| Blood creatinine increased                   | 2 (0.1)          | 3 (0.1)            |
| Blood glucose increased                      | 3 (0.1)          | 0 (0.0)            |
| Blood potassium decreased                    | 1 (0.0)          | 5 (0.2)            |
| Blood pressure decreased                     | 2 (0.1)          | 0 (0.0)            |
| Blood pressure increased                     | 4 (0.1)          | 2 (0.1)            |
| Blood thyroid stimulating hormone increased  | 1 (0.0)          | 0 (0.0)            |
| Body temperature increased                   | 0 (0.0)          | 4 (0.1)            |
| Cardiac enzymes increased                    | 3 (0.1)          | 1 (0.0)            |
| Cardiac output decreased                     | 1 (0.0)          | 0 (0.0)            |

|                                             | <b>Cangrelor</b> | <b>Clopidogrel</b> |
|---------------------------------------------|------------------|--------------------|
|                                             | <b>(N=2662)</b>  | <b>(N=2650)</b>    |
| Electrocardiogram change                    | 1 (0.0)          | 0 (0.0)            |
| Glucose urine present                       | 0 (0.0)          | 1 (0.0)            |
| Haematocrit decreased                       | 0 (0.0)          | 1 (0.0)            |
| Heart rate increased                        | 0 (0.0)          | 1 (0.0)            |
| Hepatic enzyme increased                    | 1 (0.0)          | 1 (0.0)            |
| Liver function test abnormal                | 3 (0.1)          | 1 (0.0)            |
| Platelet count decreased                    | 0 (0.0)          | 1 (0.0)            |
| Red blood cell sedimentation rate increased | 1 (0.0)          | 0 (0.0)            |
| Troponin increased                          | 0 (0.0)          | 1 (0.0)            |
| Urine output decreased                      | 0 (0.0)          | 1 (0.0)            |
| White blood cell count increased            | 3 (0.1)          | 0 (0.0)            |
| <b>Metabolism and nutrition disorders</b>   |                  |                    |
| Anorexia                                    | 0 (0.0)          | 1 (0.0)            |
| Diabetes mellitus                           | 0 (0.0)          | 1 (0.0)            |
| Diabetes mellitus inadequate control        | 1 (0.0)          | 0 (0.0)            |
| Electrolyte imbalance                       | 0 (0.0)          | 1 (0.0)            |
| Fluid imbalance                             | 1 (0.0)          | 0 (0.0)            |
| Hyperglycaemia                              | 3 (0.1)          | 1 (0.0)            |
| Hyperlipidaemia                             | 1 (0.0)          | 0 (0.0)            |
| Hypoglycaemia                               | 2 (0.1)          | 1 (0.0)            |
| Hypokalaemia                                | 7 (0.3)          | 2 (0.1)            |

|                                                        | <b>Cangrelor</b> | <b>Clopidogrel</b> |
|--------------------------------------------------------|------------------|--------------------|
|                                                        | <b>(N=2662)</b>  | <b>(N=2650)</b>    |
| <b>Musculoskeletal and connective tissue disorders</b> |                  |                    |
| Arthralgia                                             | 4 (0.1)          | 4 (0.1)            |
| Arthritis                                              | 1 (0.0)          | 0 (0.0)            |
| Back pain                                              | 90 (3.3)         | 83 (3.1)           |
| Groin pain                                             | 1 (0.0)          | 0 (0.0)            |
| Muscle spasms                                          | 2 (0.1)          | 0 (0.0)            |
| Muscular weakness                                      | 1 (0.0)          | 0 (0.0)            |
| Musculoskeletal chest pain                             | 0 (0.0)          | 3 (0.1)            |
| Musculoskeletal pain                                   | 3 (0.1)          | 13 (0.5)           |
| Musculoskeletal stiffness                              | 0 (0.0)          | 1 (0.0)            |
| Neck pain                                              | 2 (0.1)          | 2 (0.1)            |
| Pain in extremity                                      | 14 (0.5)         | 14 (0.5)           |
| Sacral pain                                            | 1 (0.0)          | 0 (0.0)            |
| <b>Nervous system disorders</b>                        |                  |                    |
| Disturbance in attention                               | 1 (0.0)          | 0 (0.0)            |
| Dizziness                                              | 9 (0.3)          | 9 (0.3)            |
| Dizziness postural                                     | 0 (0.0)          | 1 (0.0)            |
| Haemorrhage intracranial                               | 1 (0.0)          | 0 (0.0)            |
| Headache                                               | 59 (2.2)         | 67 (2.5)           |
| Hypoaesthesia                                          | 4 (0.1)          | 4 (0.1)            |
| Hypotonia                                              | 0 (0.0)          | 2 (0.1)            |

|                              | <b>Cangrelor</b> | <b>Clopidogrel</b> |
|------------------------------|------------------|--------------------|
|                              | <b>(N=2662)</b>  | <b>(N=2650)</b>    |
| Incoherent                   | 0 (0.0)          | 1 (0.0)            |
| Lethargy                     | 0 (0.0)          | 1 (0.0)            |
| Loss of consciousness        | 1 (0.0)          | 0 (0.0)            |
| Metabolic encephalopathy     | 0 (0.0)          | 1 (0.0)            |
| Migraine                     | 2 (0.1)          | 0 (0.0)            |
| Neuralgia                    | 1 (0.0)          | 0 (0.0)            |
| Paraesthesia                 | 3 (0.1)          | 4 (0.1)            |
| Psychomotor hyperactivity    | 3 (0.1)          | 2 (0.1)            |
| Somnolence                   | 0 (0.0)          | 1 (0.0)            |
| Syncope                      | 3 (0.1)          | 2 (0.1)            |
| Syncope vasovagal            | 13 (0.5)         | 4 (0.1)            |
| Transient ischaemic attack   | 0 (0.0)          | 4 (0.1)            |
| Vascular encephalopathy      | 1 (0.0)          | 0 (0.0)            |
| <b>Psychiatric disorders</b> |                  |                    |
| Abnormal dreams              | 0 (0.0)          | 1 (0.0)            |
| Aggression                   | 1 (0.0)          | 0 (0.0)            |
| Agitation                    | 3 (0.1)          | 3 (0.1)            |
| Alcohol withdrawal syndrome  | 0 (0.0)          | 1 (0.0)            |
| Anxiety                      | 13 (0.5)         | 3 (0.1)            |
| Confusional state            | 5 (0.2)          | 2 (0.1)            |
| Crying                       | 0 (0.0)          | 1 (0.0)            |

|                                                 | <b>Cangrelor</b> | <b>Clopidogrel</b> |
|-------------------------------------------------|------------------|--------------------|
|                                                 | <b>(N=2662)</b>  | <b>(N=2650)</b>    |
| Delirium                                        | 2 (0.1)          | 3 (0.1)            |
| Disorientation                                  | 1 (0.0)          | 1 (0.0)            |
| Insomnia                                        | 10 (0.4)         | 15 (0.6)           |
| Mental status changes                           | 1 (0.0)          | 0 (0.0)            |
| Nervousness                                     | 0 (0.0)          | 1 (0.0)            |
| Panic attack                                    | 1 (0.0)          | 1 (0.0)            |
| <b>Renal and urinary disorders</b>              |                  |                    |
| Bladder distension                              | 0 (0.0)          | 1 (0.0)            |
| Bladder spasm                                   | 1 (0.0)          | 0 (0.0)            |
| Calyceal diverticulum                           | 0 (0.0)          | 1 (0.0)            |
| Dysuria                                         | 4 (0.1)          | 3 (0.1)            |
| Incontinence                                    | 0 (0.0)          | 1 (0.0)            |
| Nephropathy toxic                               | 2 (0.1)          | 0 (0.0)            |
| Proteinuria                                     | 0 (0.0)          | 1 (0.0)            |
| Renal failure                                   | 3 (0.1)          | 2 (0.1)            |
| Renal failure acute                             | 1 (0.0)          | 1 (0.0)            |
| Renal failure chronic                           | 1 (0.0)          | 0 (0.0)            |
| Renal impairment                                | 0 (0.0)          | 1 (0.0)            |
| Urinary retention                               | 5 (0.2)          | 1 (0.0)            |
| <b>Reproductive system and breast disorders</b> |                  |                    |
| Benign prostatic hyperplasia                    | 0 (0.0)          | 1 (0.0)            |

|                                                        | <b>Cangrelor</b> | <b>Clopidogrel</b> |
|--------------------------------------------------------|------------------|--------------------|
|                                                        | <b>(N=2662)</b>  | <b>(N=2650)</b>    |
| <b>Respiratory, thoracic and mediastinal disorders</b> |                  |                    |
| Acute pulmonary oedema                                 | 3 (0.1)          | 0 (0.0)            |
| Atelectasis                                            | 0 (0.0)          | 1 (0.0)            |
| Bronchospasm                                           | 1 (0.0)          | 1 (0.0)            |
| Chronic obstructive pulmonary disease                  | 0 (0.0)          | 1 (0.0)            |
| Cough                                                  | 3 (0.1)          | 6 (0.2)            |
| Dyspnoea                                               | 37 (1.4)         | 14 (0.5)           |
| Laryngeal oedema                                       | 0 (0.0)          | 1 (0.0)            |
| Nasal discomfort                                       | 1 (0.0)          | 0 (0.0)            |
| Pharyngolaryngeal pain                                 | 0 (0.0)          | 1 (0.0)            |
| Pulmonary congestion                                   | 0 (0.0)          | 1 (0.0)            |
| Pulmonary embolism                                     | 0 (0.0)          | 1 (0.0)            |
| Pulmonary fibrosis                                     | 0 (0.0)          | 1 (0.0)            |
| Pulmonary oedema                                       | 6 (0.2)          | 6 (0.2)            |
| Rales                                                  | 0 (0.0)          | 4 (0.1)            |
| Respiratory failure                                    | 1 (0.0)          | 0 (0.0)            |
| Rhinorrhoea                                            | 1 (0.0)          | 0 (0.0)            |
| Sleep apnoea syndrome                                  | 0 (0.0)          | 1 (0.0)            |
| <b>Skin and subcutaneous tissue disorders</b>          |                  |                    |
| Angioneurotic oedema                                   | 1 (0.0)          | 0 (0.0)            |
| Cold sweat                                             | 0 (0.0)          | 1 (0.0)            |

|                                        | <b>Cangrelor</b> | <b>Clopidogrel</b> |
|----------------------------------------|------------------|--------------------|
|                                        | <b>(N=2662)</b>  | <b>(N=2650)</b>    |
| Dermatitis allergic                    | 0 (0.0)          | 1 (0.0)            |
| Erythema                               | 0 (0.0)          | 1 (0.0)            |
| Hyperhidrosis                          | 2 (0.1)          | 3 (0.1)            |
| Pruritus                               | 2 (0.1)          | 3 (0.1)            |
| Psoriasis                              | 0 (0.0)          | 1 (0.0)            |
| Purpura                                | 1 (0.0)          | 0 (0.0)            |
| Rash                                   | 8 (0.3)          | 4 (0.1)            |
| Rash erythematous                      | 1 (0.0)          | 1 (0.0)            |
| Rash generalised                       | 0 (0.0)          | 1 (0.0)            |
| Skin ulcer                             | 1 (0.0)          | 0 (0.0)            |
| Swelling face                          | 1 (0.0)          | 0 (0.0)            |
| Urticaria                              | 0 (0.0)          | 1 (0.0)            |
| <b>Surgical and medical procedures</b> |                  |                    |
| Pacemaker generated rhythm             | 0 (0.0)          | 1 (0.0)            |
| <b>Vascular disorders</b>              |                  |                    |
| Accelerated hypertension               | 1 (0.0)          | 1 (0.0)            |
| Arteriovenous fistula                  | 0 (0.0)          | 2 (0.1)            |
| Embolism                               | 1 (0.0)          | 1 (0.0)            |
| Flushing                               | 1 (0.0)          | 0 (0.0)            |
| Haematoma                              | 3 (0.1)          | 0 (0.0)            |
| Hypertension                           | 28 (1.0)         | 22 (0.8)           |

|                         | <b>Cangrelor</b> | <b>Clopidogrel</b> |
|-------------------------|------------------|--------------------|
|                         | <b>(N=2662)</b>  | <b>(N=2650)</b>    |
| Hypertensive crisis     | 1 (0.0)          | 0 (0.0)            |
| Hypertensive emergency  | 1 (0.0)          | 0 (0.0)            |
| Hypotension             | 42 (1.6)         | 37 (1.4)           |
| Orthostatic hypotension | 2 (0.1)          | 0 (0.0)            |
| Peripheral ischaemia    | 0 (0.0)          | 1 (0.0)            |
| Phlebitis               | 2 (0.1)          | 1 (0.0)            |
| Phlebitis superficial   | 1 (0.0)          | 0 (0.0)            |
| Reperfusion injury      | 3 (0.1)          | 3 (0.1)            |
| Shock                   | 0 (0.0)          | 1 (0.0)            |
| Thrombosis              | 1 (0.0)          | 0 (0.0)            |
| Vascular pseudoaneurysm | 0 (0.0)          | 1 (0.0)            |

## **Online Figure Legends**

**Figure 1.** CONSORT diagram.

**Figure 2.** Transfusion rates for all patients (including coronary artery bypass graft) in subgroups at high risk of bleeding.

# CHAMPION PLATFORM CONSORT DIAGRAM

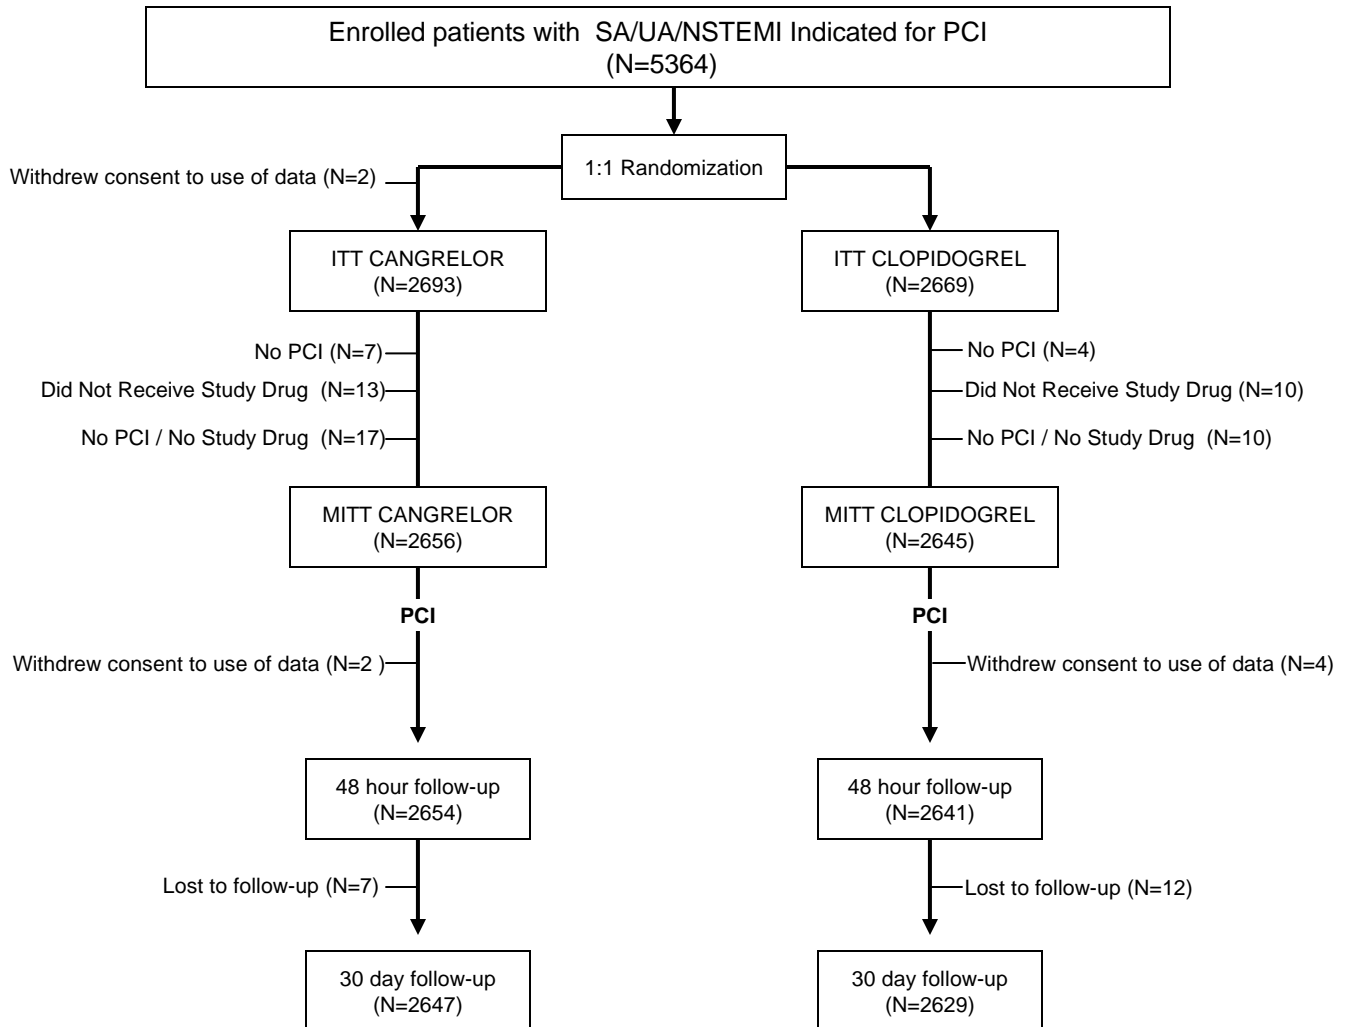

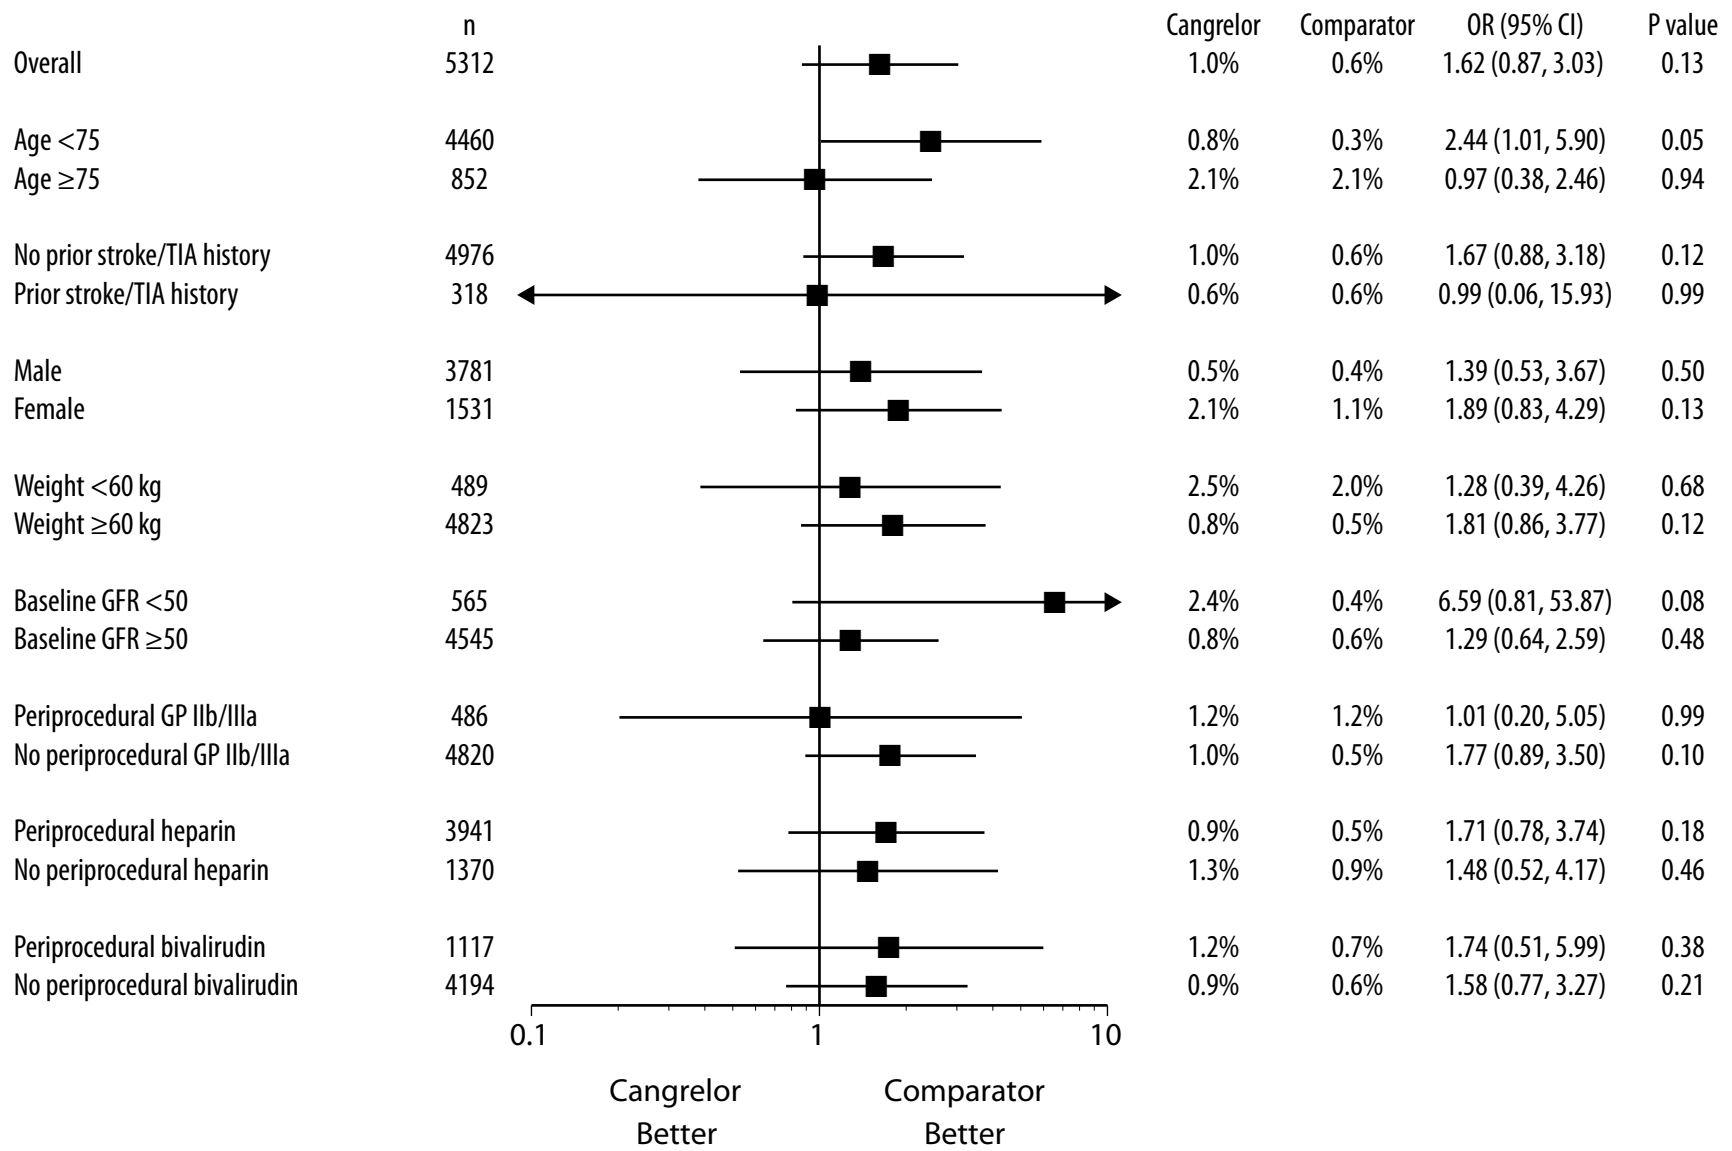

Supplement: nejm_bhatt_2330sa1.pdf [file nejm_bhatt_2330sa1.pdf]
